# Supplementary material for: Composites of BaAl2O4:Eu2+,Dy3+/organic dye encapsulated in mesoporous silica as multicolor long persistent phosphors based on radiative energy transfer
Source: Royal Society of Chemistry journal article supplement (doi:10.1039/c7nj00209b), 2017-01-01
Supplement: c7nj00209b1.pdf [file c7nj00209b1.pdf]

**BaAl<sub>2</sub>O<sub>4</sub>:Eu<sup>2+</sup>, Dy<sup>3+</sup>/ organic dye encapsulated mesoporous silica composites  
multicolor long persistent phosphor based on radiative energy transfer process**

Sourav Das<sup>a</sup>, Jairam Manam<sup>a\*</sup> and S. K. Sharma<sup>a</sup>

<sup>a</sup>Department of Applied Physics, Indian Institute of Technology (Indian School of Mines),  
Dhanbad-826004, India.

\*Corresponding author: [jairam.manam@gmail.com](mailto:jairam.manam@gmail.com), [sourav.das1988@gmail.com](mailto:sourav.das1988@gmail.com)

Phone No. +91-326-223-5439, Fax No. +91-326-2296563.

**List of Supplementary Figure**

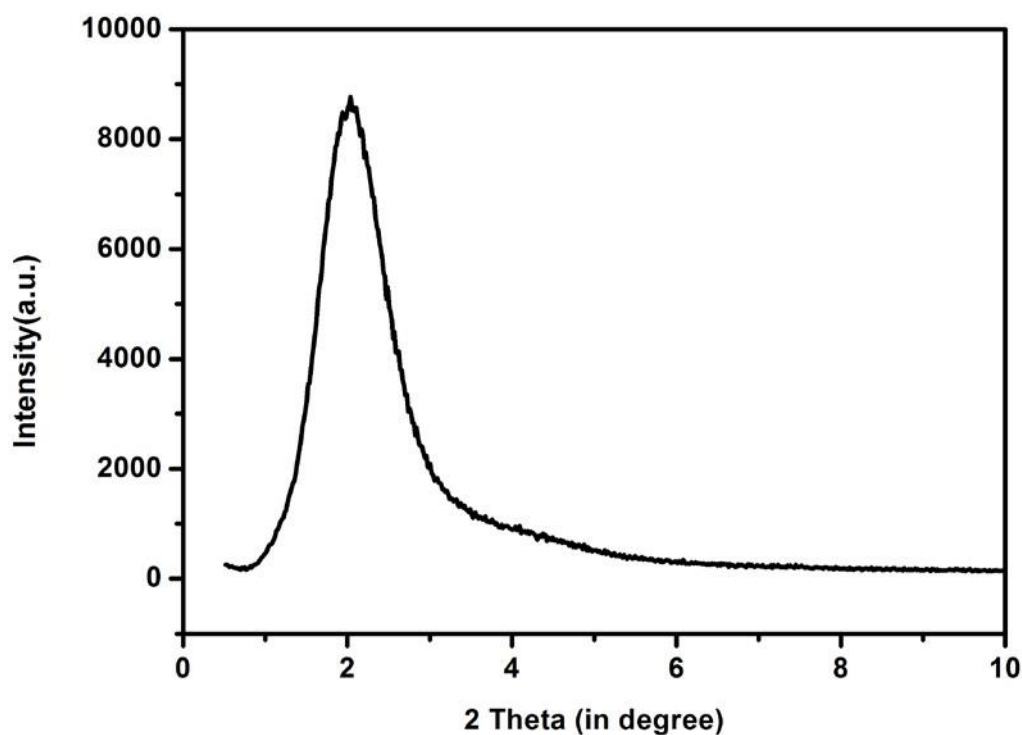

**S1.** Powder XRD pattern of mesoporous silica nanoparticles.

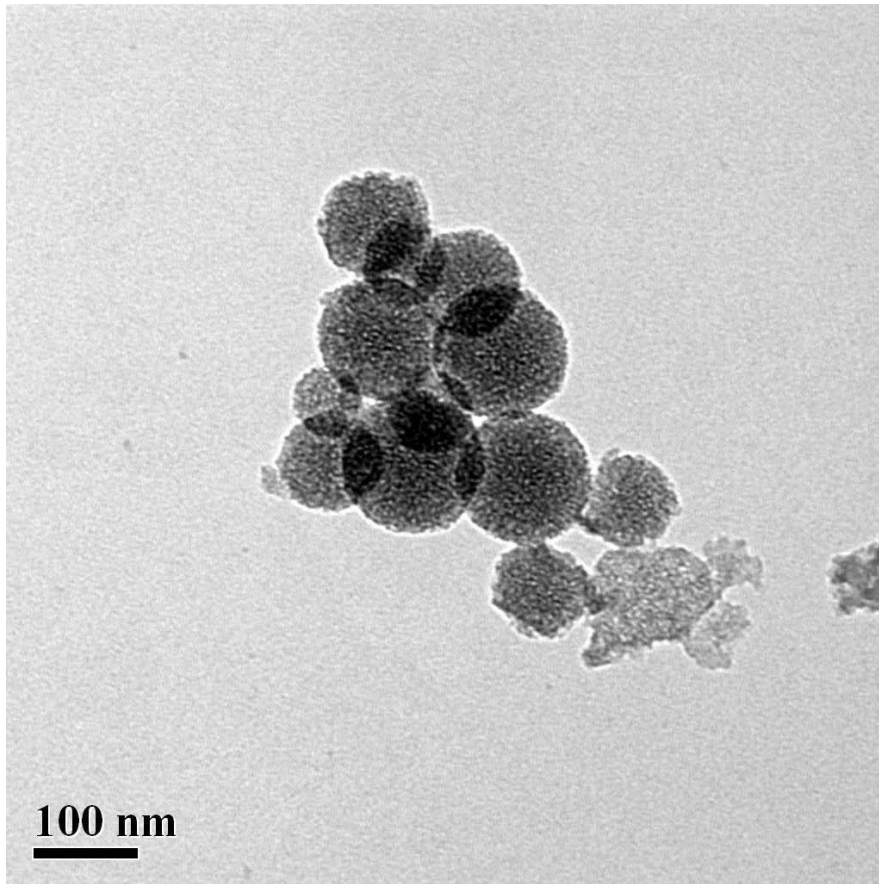

**S2.** Transmission Electron Microscope (TEM) image of mesoporous silica nanoparticles.

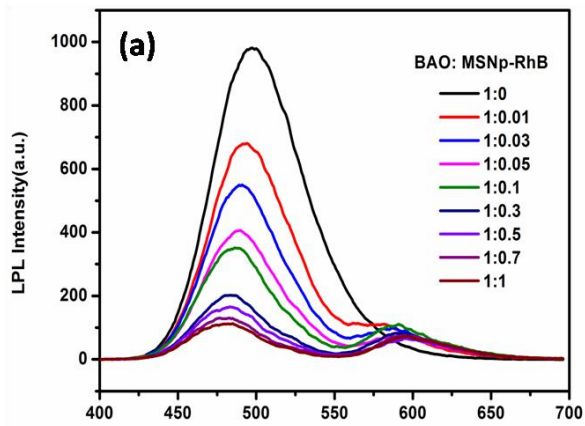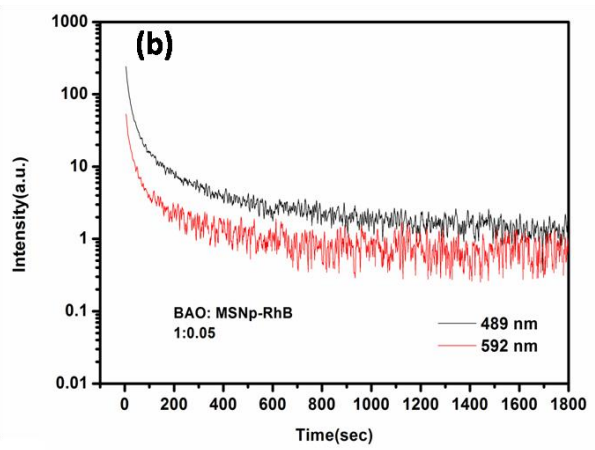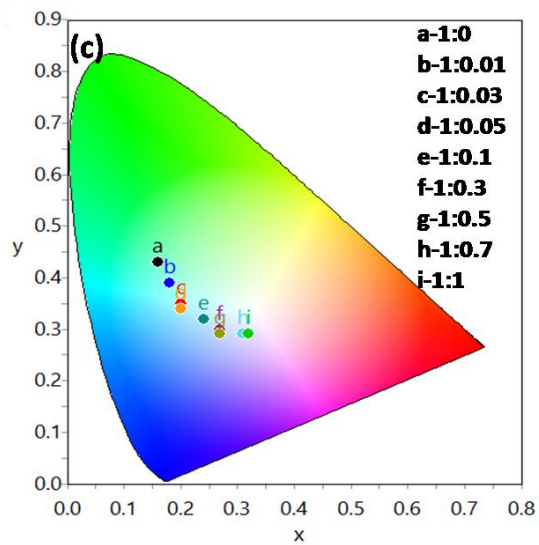

**S3.** (a) Long persistent luminescence(LPL) spectra, (b) Afterglow decay curves, (c) CIE diagram of BAO/MSNp-RhB composites with different ratio.

**S4.** The afterglow decay parameters of BAO/MSNp-RhB(mass ratio BAO:MSNp-RhB=1:0.05) composites monitored at 489 nm and 592 nm.

| $\lambda_{\text{emi}}=489\text{nm}$ |                    |                    | $\lambda_{\text{emi}}=592\text{nm}$ |                    |                    |
|-------------------------------------|--------------------|--------------------|-------------------------------------|--------------------|--------------------|
| $\tau_1(\text{s})$                  | $\tau_2(\text{s})$ | $\tau_3(\text{s})$ | $\tau_1(\text{s})$                  | $\tau_2(\text{s})$ | $\tau_3(\text{s})$ |
| 6.74±0.08                           | 28.44±0.40         | 207.201±3.29       | 5.11±0.20                           | 25.86±0.68         | 199.91±6.86        |

**S5.** The CIE co-ordinates of BAO/MSNp-RhB composite phosphor.

| Symbol | Mass ratio of<br>BAO:MSNp-Rh6G<br>(w:w) | Colour Co-ordinates |      |
|--------|-----------------------------------------|---------------------|------|
|        |                                         | x                   | y    |
| a      | 1:0                                     | 0.16                | 0.43 |
| b      | 1:0.01                                  | 0.18                | 0.39 |
| c      | 1:0.03                                  | 0.20                | 0.35 |
| d      | 1:0.05                                  | 0.20                | 0.34 |
| e      | 1:0.1                                   | 0.24                | 0.32 |
| f      | 1:0.3                                   | 0.27                | 0.30 |
| g      | 1:0.5                                   | 0.27                | 0.29 |
| h      | 1:0.7                                   | 0.31                | 0.29 |
| i      | 1:1                                     | 0.32                | 0.29 |
